# Supplementary material for: Cancer Stem Cell Regulated Phenotypic Plasticity Protects Metastasized Cancer Cells from Ferroptosis
Source: Research Square preprint supplement (doi:10.21203/rs.3.rs-701574/v1), 2021-07-26
Supplement: Supplementary file 1 [file 410128e2fd23780c939ac67c.docx]

**Extended Data Table 1 Hematological and blood biochemical indices in WAY262611 or Gallocyanine treated BALB/c mice.** The BALB/c mice were treated with saline, WAY262611 or Gallocyanine for 3 weeks. Mice were sacrificed and hematological and blood biochemical parameters were analyzed. The values are shown as mean ± S.D. Statistical significance was determined by one-way ANOVA followed by Tukey’s multiple comparison test (versus saline treated group).

| Hematological parameter | Control  n=4 | WAY26261  n=5 | Gallocyanine  n=5 |
| --- | --- | --- | --- |
| White blood cell  WBC (109/L) | 7.43 ± 2.00 | 7.23 ± 0.67  *p*=0.971 | 9.75 ± 1.63  *p*=0.071 |
| Neutrophilic granulocyte  NEUT (109/L) | 1.20 ± 0.38 | 1.20 ± 0.21  *p*>0.999 | 1.31 ± 0.41  *p*=0.835 |
| Lymphocytes  LYMPH (109/L) | 6.21 ± 1.62 | 5.99 ± 0.67  *p*=0.950 | 8.36 ± 1.36  *p*=0.045 * |
| Monocytes  MONO (109/L) | 0.02 ± 0.008 | 0.028 ± 0.008  *p*=0.587 | 0.066 ± 0.019  *p*=0.001 *** |
| Eosnophils  EO (109/L) | 0.003 ± 0.005 | 0.006 ± 0.009  *p*=0.646 | 0.002 ± 0.004  *p*=0.990 |
| Basophils  BASO (109/L) | 0.01 ± 0.00 | 0.01 ± 0.007  *p*>0.999 | 0.014 ± 0.005  *p*=0.453 |
| Red blood cell  RBC (1012/L) | 10.56 ± 0.25 | 10.06 ± 0.26  *p*=0.034 * | 10.09 ± 0.29  *p*=0.044 * |
| Hemogloblin  HGB (g/L) | 161.5 ± 3.51 | 154.6 ± 3.91  *p*=0.061 | 153.4 ± 5.08  *p*=0.030 * |
| Hematocrit  HCT (%) | 56.20 ± 1.61 | 52.10 ± 1.44  *p*=0.007 ** | 52.08 ± 1.92  *p*=0.007 ** |
| Mean corpuscular volume  MCV (fL) | 53.28 ± 0.80 | 51.78 ± 0.49  *p*=0.022 * | 51.60 ± 0.90  *p*=0.012 * |
| Mean corpuscular hemogloblin MCH (pg/cell) | 15.30 ± 0.16 | 15.36 ± 0.29  *p*=0.882 | 15.22 ± 0.16  *p*=0.804 |
| Mean corpuscular hemogloblin concentration MCHC (g/L) | 287.5 ± 2.08 | 296.8 ± 5.36  *p*=0.009 ** | 294.4 ± 3.36  *p*=0.044 * |
| Platelets  PLT (109/L) | 684.5 ± 30.2 | 727 ± 66.5  *p*=0.468 | 725 ± 66.2  *p*=0.498 |
| Plateletcrit  PCT (%) | 0.518 ± 0.015 | 0.534 ± 0.045  *p*=0.754 | 0.576 ± 0.045  *p*=0.083 |
| Platelet distribution width  PDW (fL) | 8.20 ± 0.61 | 8.48 ± 1.15  *p*=0.832 | 9.96 ± 0.55  *p*=0.017 * |
| Mean platelet volume  MPV (fL) | 7.55 ± 0.10 | 7.38 ± 0.41  *p*=0.663 | 8.00 ± 0.35  *p*=0.115 |
| Platelet larger cell ratio  P-LCR (%) | 11.75 ± 1.26 | 10.00 ± 3.32  *p*=0.545 | 15.00 ± 2.92  *p*=0.176 |
| Blood biochemical  parameters | **Control**  **n=3** | **WAY26261**  **n=3** | **Gallocyanine**  **n=3** |
| Alanine aminotransferase  ALT (U/L) | 41.67 ± 4.04 | 44.00 ± 5.57  *p*=0.905 | 161.00 ± 11.27  *p*<0.0001 *** |
| Aspartate aminotransferase AST (U/L) | 107.33 ± 22.50 | 171.00 ± 67.64  *p*=0.229 | 264.33 ± 34.56  *p*=0.010 * |
| Alkaline phosphatase  ALP (U/L) | 185.67 ± 3.79 | 184.33 ± 10.60  *p*=0.984 | 279.33 ± 15.63  *p*<0.0001 *** |
| Lactate dehydrogenase  LDH (U/L) | 2047.3 ± 797.7 | 2541.7 ± 1093.6  *p*=0.677 | 3197.6 ± 140.9  *p*=0.204 |
| Urea  UREA mmol/L | 8.00 ± 1.40 | 8.13 ± 0.32  *p*=0.986 | 8.40 ± 1.45  *p*=0.885 |
| Creatinine  CRE (μmol/L) | 21.97 ± 4.61 | 18.17 ± 1.20  *p*=0.408 | 19.13 ± 4.38  *p*=0.580 |
| Uric acid  UA (μmol/L) | 77.67 ± 15.95 | 115.33 ± 30.99  *p*=0.151 | 88.33 ± 18.58  *p*=0.798 |
| Creatinine kinase  CK (U/L) | 881.7 ± 293.7 | 1794.3 ± 1303.2  *p*=0.343 | 1047.7 ± 402.7  *p*=0.955 |

**Extended Data Table 2 A summary of information about the clinical characteristics, gender, age, tumor stage and molecular subtype of patients.**

| Patient ID | Gender | Age | Cancer type | Tumor stage | ER | PR | HER2 | Tumor site |
| --- | --- | --- | --- | --- | --- | --- | --- | --- |
| T1823607 | Female | 52 | Breast cancer | II | 90% | 70% | Negative | Left |
| T1823726 | Female | 58 | Breast cancer | III | Negative | Negative | 3+ | Left |
| T1900109 | Female | 52 | Breast cancer | II | 90% | 80% | 1+ | Right |
| T1901061 | Female | 48 | Breast cancer | III | Negative | Negative | 3+ | Left |
| T1901094 | Female | 47 | Breast cancer | III | 40% | 40% | 3+ | Right |
| T1901872 | Female | 54 | Breast cancer | II | 90% | 80% | 2+ | Right |
| T1901878 | Female | 43 | Breast cancer | II | 85% | 80% | 3+ | Right |
| T1902368 | Female | 71 | Breast cancer | II | 90% | 30% | Negative | Left |
| T1902877 | Female | 62 | Breast cancer | II | 90% | 20% | 2+ | Left |
| T1920759 | Female | 57 | Breast cancer | III | Negative | Negative | 3+ | Right |
| T1921241 | Female | 55 | Breast cancer | III | 90% | 5% | 1+ | Left |
| T1921426 | Female | 55 | Breast cancer | II | 90% | 10% | 1+ | Left |
| T1921577 | Female | 70 | Breast cancer | II | 90% | 90% | 1+ | Left |
| T1922133 | Female | 39 | Breast cancer | II | 90% | 90% | Negative | Right |
| T1922414 | Female | 44 | Breast cancer | II | Negative | Negative | 3+ | Left |

**Extended Data Table 3 Sequences of shRNAs, and primers for cloning, ChIP assays, and qRT-PCR analysis.**

| shRNAs | Sense Strand (5'-3') | |
| --- | --- | --- |
| DKK1  shRNA1 | CCGGCGGTTCTCAATTCCAACGCTACTCGAGTAGCGTTGGAATTGAGAACCGTTTTTG | |
| DKK1  shRNA2 | CCGGCCTGTCCTGAAAGAAGGTCAACTCGAGTTGACCTTCTTTCAGGACAGGTTTTTG | |
| β-CATENIN  shRNA1 | CCGGAGGTGCTATCTGTCTGCTCTACTCGAGTAGAGCAGACAGATAGCACCTTTTTT | |
| β-CATENIN  shRNA2 | CCGGGCTTGGAATGAGACTGCTGATCTCGAGATCAGCAGTCTCATTCCAAGCTTTTT | |
| SLC7A11  shRNA | CCGGCCTGCGTATTATCTCTTTATTCTCGAGAATAAAGAGATAATACGCAGGTTTTTG | |
| mDKK1  shRNA | CCGGGATCACCATCAAGCCAGCAATGGATCCATTGCTGGCTTGATGGTGATCTTTTTG | |
| Primers for plasmid construction | **Sense Strand (5'-3')** | **Antisense Strand (5'-3')** |
| Firefly luciferase cloning primer | CCGAATTCATGGCCGATGCTAAGAACATTA | AAGGATCCTTACACGGCGATCTTGCCGCCT |
| DKK1 (Homo) cloning primer | ATGAATTCATGATGGCTCTGGGCGCAGCG | GCGGATCCTTAGTGTCTCTGACAAGTGTG |
| DKK1 (Mus) cloning primer | GGAATTCATGATGGTTGTGTGTGCAGCG | AAGGATCCTTAGTGTCTCTGGCAGGTGTG |
| DKK1 promoter cloning primer | GGCCGCTAGCAGATTCTGTCCAGACTCAGTGA | ATATCTCGAGCGCCGCCACCGCCACCGCGGCT |
| DKK1 promoter mut1 primer | GCTTTGGTCCCGGCCCTCACGCGTCTGCCTAATCAAGTTC | AGGCAGACGCGTGAGGGCCGGGACCAAAGCGGACAGGGTC |
| DKK1 promoter mut2 primer | CCAGCCCCTCCCAGCATCCCATCCCGGCTTTGTTGTCTCC | AAGCCGGGATGGGATGCTGGGAGGGGCTGGGAGGGGGTGTC |
| Primers for ChIP assay | **Sense Strand (5'-3')** | **Antisense Strand (5'-3')** |
| DKK1 ChIP | CCGGCCACTTTGATCTCAC | GACCATCCGATAATCAAACCA |
| GAPDH ChIP | TACTAGCGGTTTTACGGGCG | TCGAACAGGAGGAGCAGAGAGCGA |
| Primers for qRT-PCR | **Sense Strand (5'-3')** | **Antisense Strand (5'-3')** |
| GAPDH | TGCACCACCAACTGCTTAGC | GGCATGGACTGTGGTCATGAG |
| SOX2 | GGGGGAATGGACCTTGTATAG | GCAAAGCTCCTACCGTACCA |
| KLF4 | ACATGGCTGTCAGCGACGCG | GCCAGCGGTTATTCGGGGCAC |
| CD44 | CAGGGACAGCTGCAGCCTCA | ACCTCGTCCCATGGGGTGTG |
| NANOG | CAACCAGACCCAGAACATCC | TTCCAAAGCAGCCTCCAAG |
| SLC7A11 | ATTCGGACCCATTTAGTACAGG | CTCCGACATTATTCTAAACCAC |
